# Supplementary material for: Ratiometric hydrostatic pressure sensing in water via dual emissions of a water-soluble donor–acceptor–donor triad
Source: Royal Society of Chemistry journal article supplement (doi:10.1039/d5cc06674c), 2026-01-01
Supplement: d5cc06674c1.pdf [file d5cc06674c1.pdf]

*Electronic Supplementary Information*  
*for*

**Ratiometric hydrostatic pressure sensing in water *via* dual emissions of a water-soluble donor–acceptor–donor triad**

**Tomoyuki Hamachi,<sup>a</sup> Kotaro Matsumoto,<sup>b</sup> Youhei Takeda<sup>\*c</sup> and Gaku Fukuhara<sup>\*a,b</sup>**

*<sup>a</sup>Institute for Materials Chemistry and Engineering, Kyushu University, 744 Motoooka, Nishi-ku, Fukuoka 819-0395, Japan.*

*<sup>b</sup>Department of Chemistry, Institute of Science Tokyo, 2-12-1 Ookayama, Meguro-ku, Tokyo 152-8551 Japan.*

*<sup>c</sup>Department of Applied Chemistry, Graduate School of Engineering, The University of Osaka, Yamadaoka 2-1, Suita, Osaka 565-0871, Japan.*

E-mail: [takeda@chem.eng.osaka-u.ac.jp](mailto:takeda@chem.eng.osaka-u.ac.jp) (Y.T.), [gaku@ms.ifoc.kyushu-u.ac.jp](mailto:gaku@ms.ifoc.kyushu-u.ac.jp) (G.F.)

## Experimental Section

**Materials.** All commercial reagents and solvents were used without further purification. The sample solutions were dissolved in spectroscopic-grade toluene, methanol (MeOH), and H<sub>2</sub>O (Milli-Q). The target materials (**N-Boc-PTZ-DBPHZ** and **Dend-MCM**) were synthesized according to the literature.<sup>1</sup>

**Instruments.** UV/vis spectra were acquired using a JASCO V-770 spectrometer. Fluorescence spectra were acquired by using a JASCO FP-8500 spectrofluorometer. Fluorescence lifetime decays were obtained using a Hamamatsu QuantaTaurus-Tau single-photon counting apparatus with a light-emitting-diode light source ( $\lambda_{\text{ex}} = 405 \text{ nm}$ ). Dynamic light scattering (DLS) experiments were performed using an Otsuka ELSZ-2000 instrument.

**Hydrostatic pressure spectroscopy.** The spectroscopic experiments under hydrostatic pressure were conducted using a custom-built high-pressure apparatus; the details are summarized in our previous publications.<sup>2,3</sup> In this apparatus (Figure S1), a quartz inner cell (2 mm path length) with a Teflon tube was filled with the sample solution. The cell was set into the outer cell, which was filled with H<sub>2</sub>O that can be hydrostatically pressurized by a hand pump. The outer cell was placed in the spectrometer, enabling acquisition of hydrostatic pressure data (range: 0.1–400 MPa) through the sapphire windows.

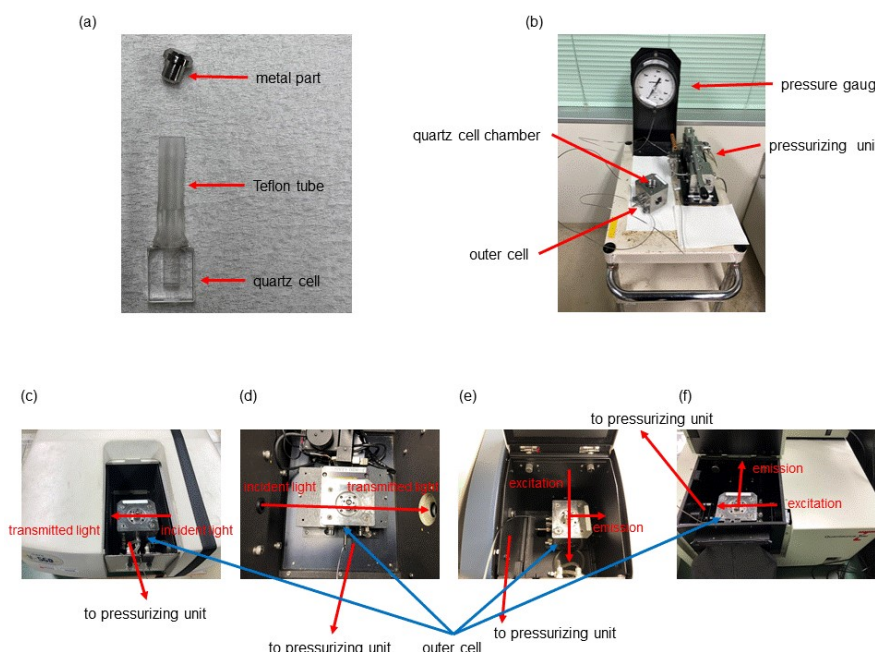

**Figure S1.** Photographs of (a) inner quartz cell, (b) pressurizing units, and setups for (c) UV/vis spectroscopy, (d) circular dichroism, (e) fluorescence emission, and (d) lifetime measurements. Reproduced with permission from ref. 3. Copyright 2020, John Wiley & Sons.

<sup>1</sup> T. Enjou, S. Goto, Q. Liu, F. Ishiwari, A. Saeki, T. Uematsu, Y. Ikemoto, S. Watanabe, G. Matsuba, K. Ishibashi, G. Watanabe, S. Minakata, Y. Sagara and Y. Takeda, *Chem. Commun.*, 2024, **60**, 3653–3656.

<sup>2</sup> H. Mizuno and G. Fukuhara, *Acc. Chem. Res.* 2022, **55**, 1748–1762.

<sup>3</sup> H. Mizuno, M. Kitamatsu, Y. Imai and G. Fukuhara, *ChemPhotoChem* 2020, **4**, 502–507.

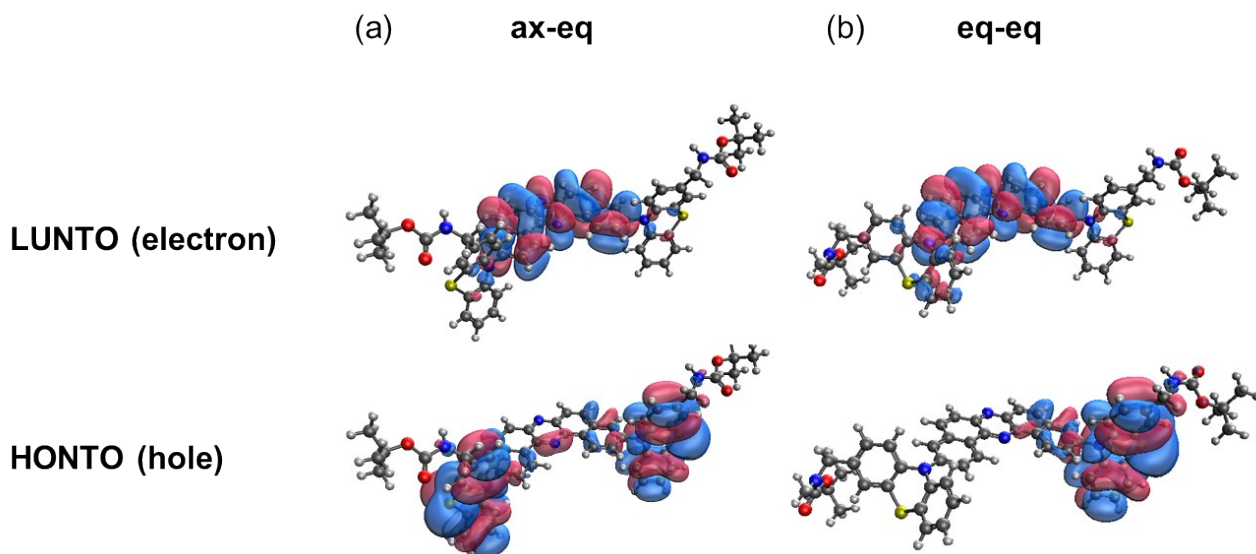

**Figure S2.** Hole and electron distributions of the (a) *ax-eq* and (b) *eq-eq* conformations in **N-Boc-PTZ-DBPHZ**, visualized by natural transition orbitals (NTOs). The NTOs were calculated at the TD-TDA level (LC- $\omega$ PBE/aug-cc-pVDZ) in toluene, using the ground state ( $S_0$ ) optimized geometry obtained at the PBE0/6-31G(d,p) level.

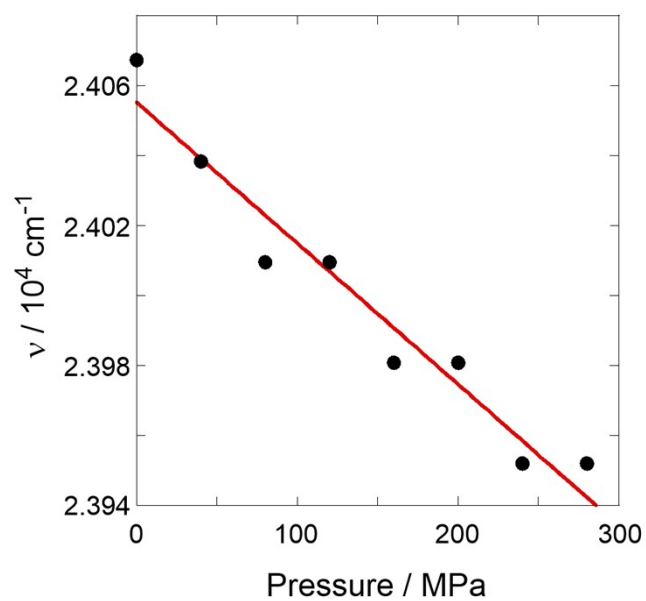

**Figure S3.** Plots of wavenumber changes for the pressure-induced absorption maxima of **N-Boc-PTZ-DBPHZ** in toluene (259  $\mu\text{M}$ ) (correlation coefficient  $r = 0.973$ , slope;  $-0.403 \text{ cm}^{-1} \text{ MPa}^{-1}$ ).

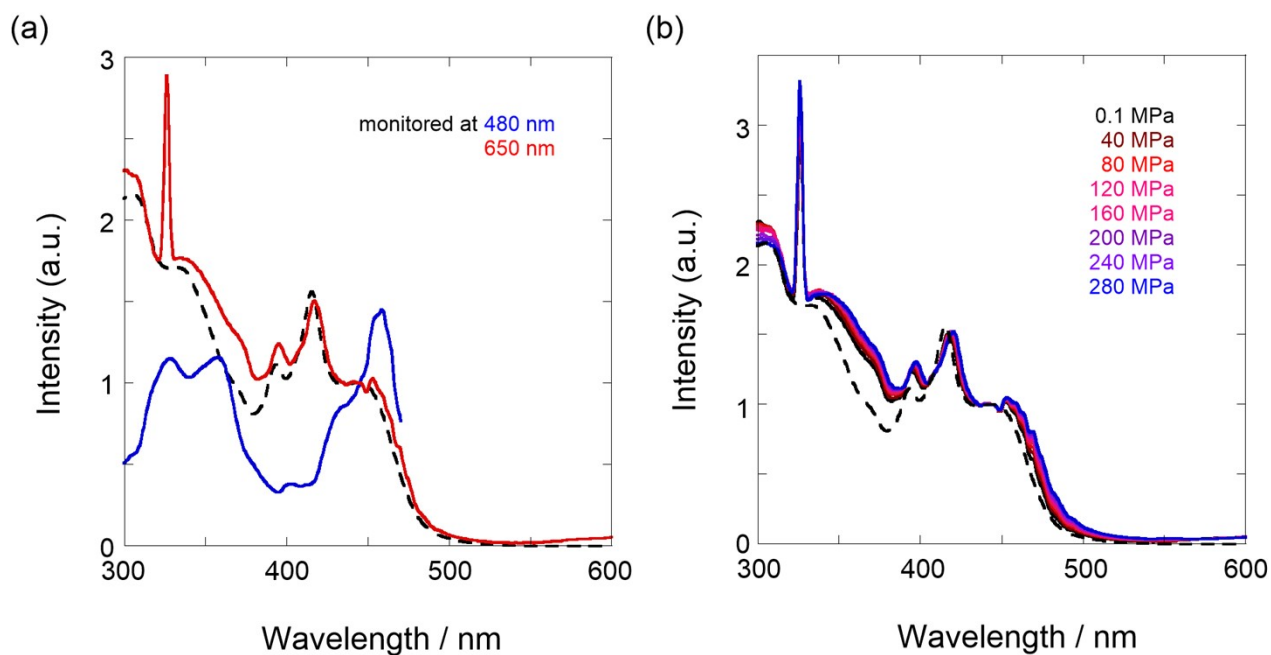

**Figure S4.** (a) Excitation spectra of **N-Boc-PTZ-DBPHZ** in toluene (259  $\mu\text{M}$ ), monitored at 480 nm (blue line) and 650 nm (red line) at room temperature in a high-pressure cell. (b) Excitation spectra of **N-Boc-PTZ-DBPHZ** in toluene (259  $\mu\text{M}$ ), monitored at 650 nm at room temperature, in a high-pressure cell. Applied pressure: 0.1, 40, 80, 120, 160, 200, 240, and 280 MPa (from black to blue).

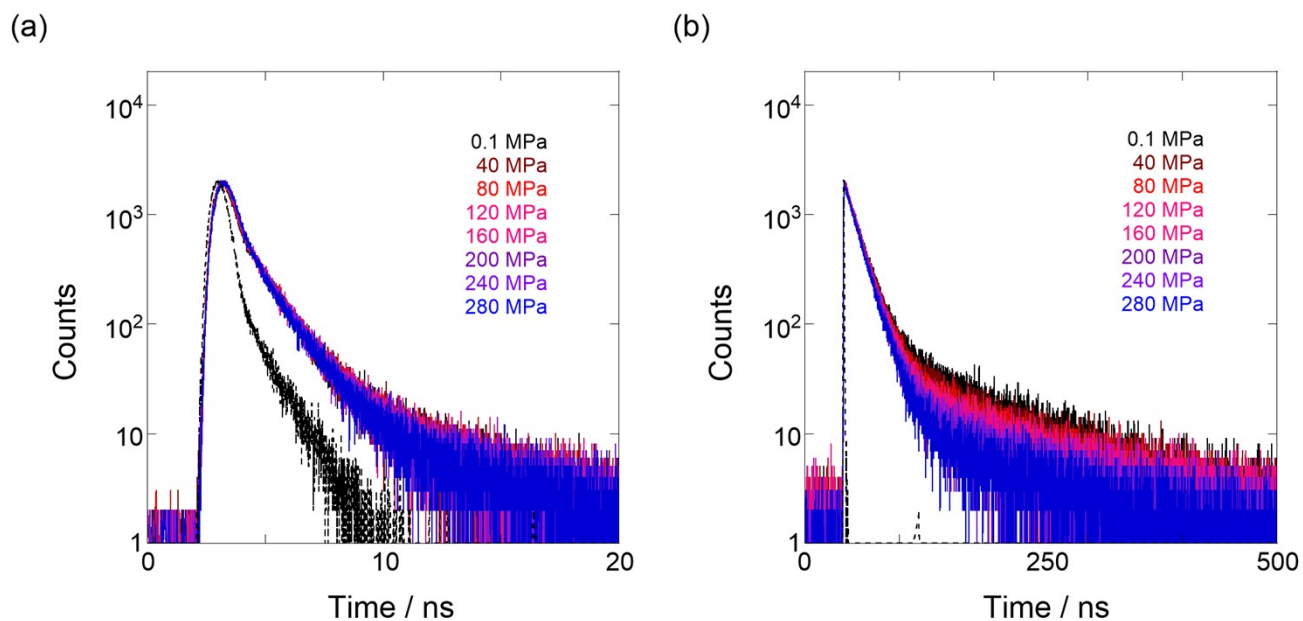

**Figure S5.** Time-correlated fluorescence decays ( $\lambda_{\text{ex}} = 405$  nm) of **N-Boc-PTZ-DBPHZ** in toluene (a:  $\lambda_{\text{em}} = 490$  nm, b:  $\lambda_{\text{em}} = 620$  nm, 259  $\mu\text{M}$ ) at room temperature, measured in a high-pressure cell. Pressure applied: 0.1, 40, 80, 120, 160, 200, 240, and 280 MPa (from black to blue). The black dotted line represents the instrument response function.

**Table S1. Fluorescence lifetimes of N-Boc-PTZ-DBPHZ in toluene under hydrostatic pressures ( $\lambda_{\text{ex}} = 405 \text{ nm}$ )<sup>a</sup>**

| Pressure/MPa | $\lambda_{\text{em}}/\text{nm}$ | $\tau_1/\text{ns}$ | $A_1$ | $\tau_2/\text{ns}$ | $A_2$ | $\tau_3/\text{ns}$ | $A_3$ | $\tau_4/\text{ns}$ | $A_4$ | $\chi^2$ |
|--------------|---------------------------------|--------------------|-------|--------------------|-------|--------------------|-------|--------------------|-------|----------|
| 0.1          | 470                             | 0.1                | 0.46  | 1.2                | 0.54  |                    |       |                    |       | 1.3      |
|              | 490                             | 0.1                | 0.56  | 1.3                | 0.44  |                    |       |                    |       | 1.2      |
|              | 510                             | 0.2                | 0.62  | 1.4                | 0.38  |                    |       |                    |       | 1.2      |
|              | 620                             |                    |       |                    |       | 14.0               | 0.78  | 96.6               | 0.22  | 1.1      |
| 40           | 490                             | 0.2                | 0.57  | 1.3                | 0.43  |                    |       |                    |       | 1.3      |
|              | 620                             |                    |       |                    |       | 13.8               | 0.82  | 84.9               | 0.18  | 1.2      |
| 80           | 490                             | 0.2                | 0.58  | 1.3                | 0.42  |                    |       |                    |       | 1.2      |
|              | 620                             |                    |       |                    |       | 14.1               | 0.85  | 87.7               | 0.15  | 1.1      |
| 120          | 490                             | 0.2                | 0.59  | 1.3                | 0.41  |                    |       |                    |       | 1.2      |
|              | 620                             |                    |       |                    |       | 13.9               | 0.88  | 80.2               | 0.12  | 1.2      |
| 160          | 490                             | 0.2                | 0.60  | 1.3                | 0.40  |                    |       |                    |       | 1.2      |
|              | 620                             |                    |       |                    |       | 14.0               | 0.90  | 88.9               | 0.10  | 1.3      |
| 200          | 490                             | 0.2                | 0.62  | 1.3                | 0.38  |                    |       |                    |       | 1.2      |
|              | 620                             |                    |       |                    |       | 14.1               | 0.92  | 76.7               | 0.08  | 1.1      |
| 240          | 490                             | 0.3                | 0.64  | 1.3                | 0.36  |                    |       |                    |       | 1.1      |
|              | 620                             |                    |       |                    |       | 14.0               | 0.93  | 72.7               | 0.07  | 1.2      |
| 280          | 490                             | 0.3                | 0.66  | 1.3                | 0.34  |                    |       |                    |       | 1.2      |
|              | 620                             |                    |       |                    |       | 14.5               | 1.00  |                    |       | 1.5      |

<sup>a</sup>Fluorescence lifetime ( $\tau_i$ ) and relative abundance ( $A_i$ ) of each excited species, determined by the hydrostatic-pressure single-photon-counting method in a non-degassed toluene solution at room temperature.

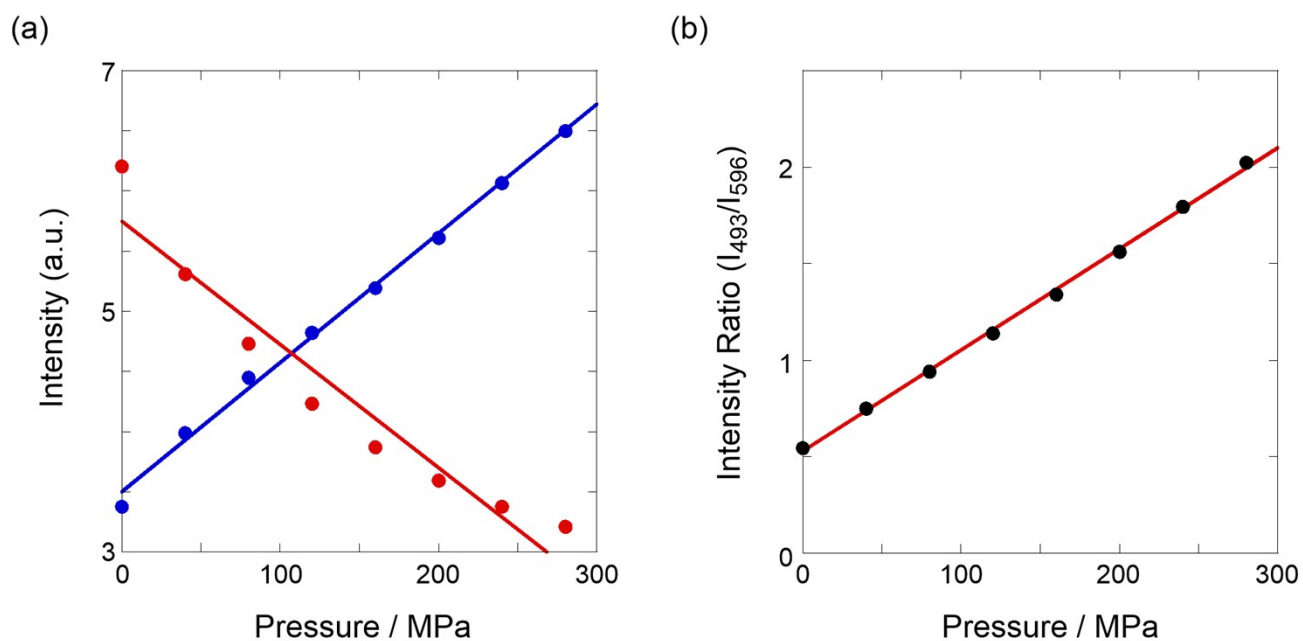

**Figure S6.** (a) Fluorescence changes of **N-Boc-PTZ-DBPHZ** in toluene (259  $\mu\text{M}$ ) at 493 nm (blue;  $r = 0.998$ , slope;  $0.0107 \text{ MPa}^{-1}$ ) and 596 nm (red;  $r = 0.965$ , slope;  $-0.0102 \text{ MPa}^{-1}$ ) upon hydrostatic pressurization. (b) Plots of fluorescence intensity ratio changes of **N-Boc-PTZ-DBPHZ** in toluene (259  $\mu\text{M}$ ) upon hydrostatic pressurization ( $r = 0.999$ , slope =  $0.00525 \text{ MPa}^{-1}$ ).



(a)

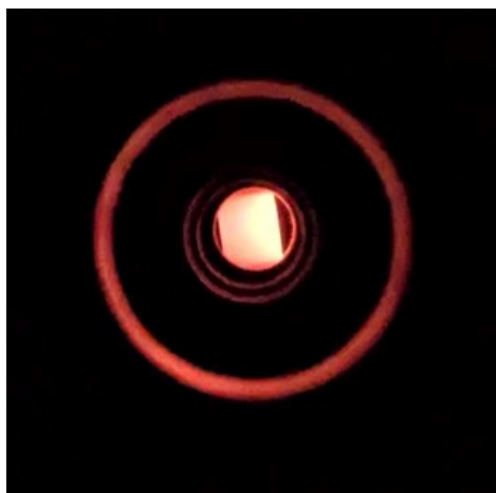

(b)

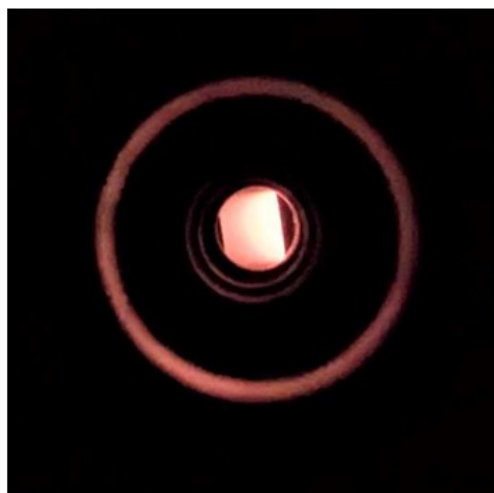

**Figure S7.** Photographs of the fluorescence images of **N-Boc-PTZ-DBPHZ** in toluene at (a) 0.1 MPa and (b) 280 MPa.

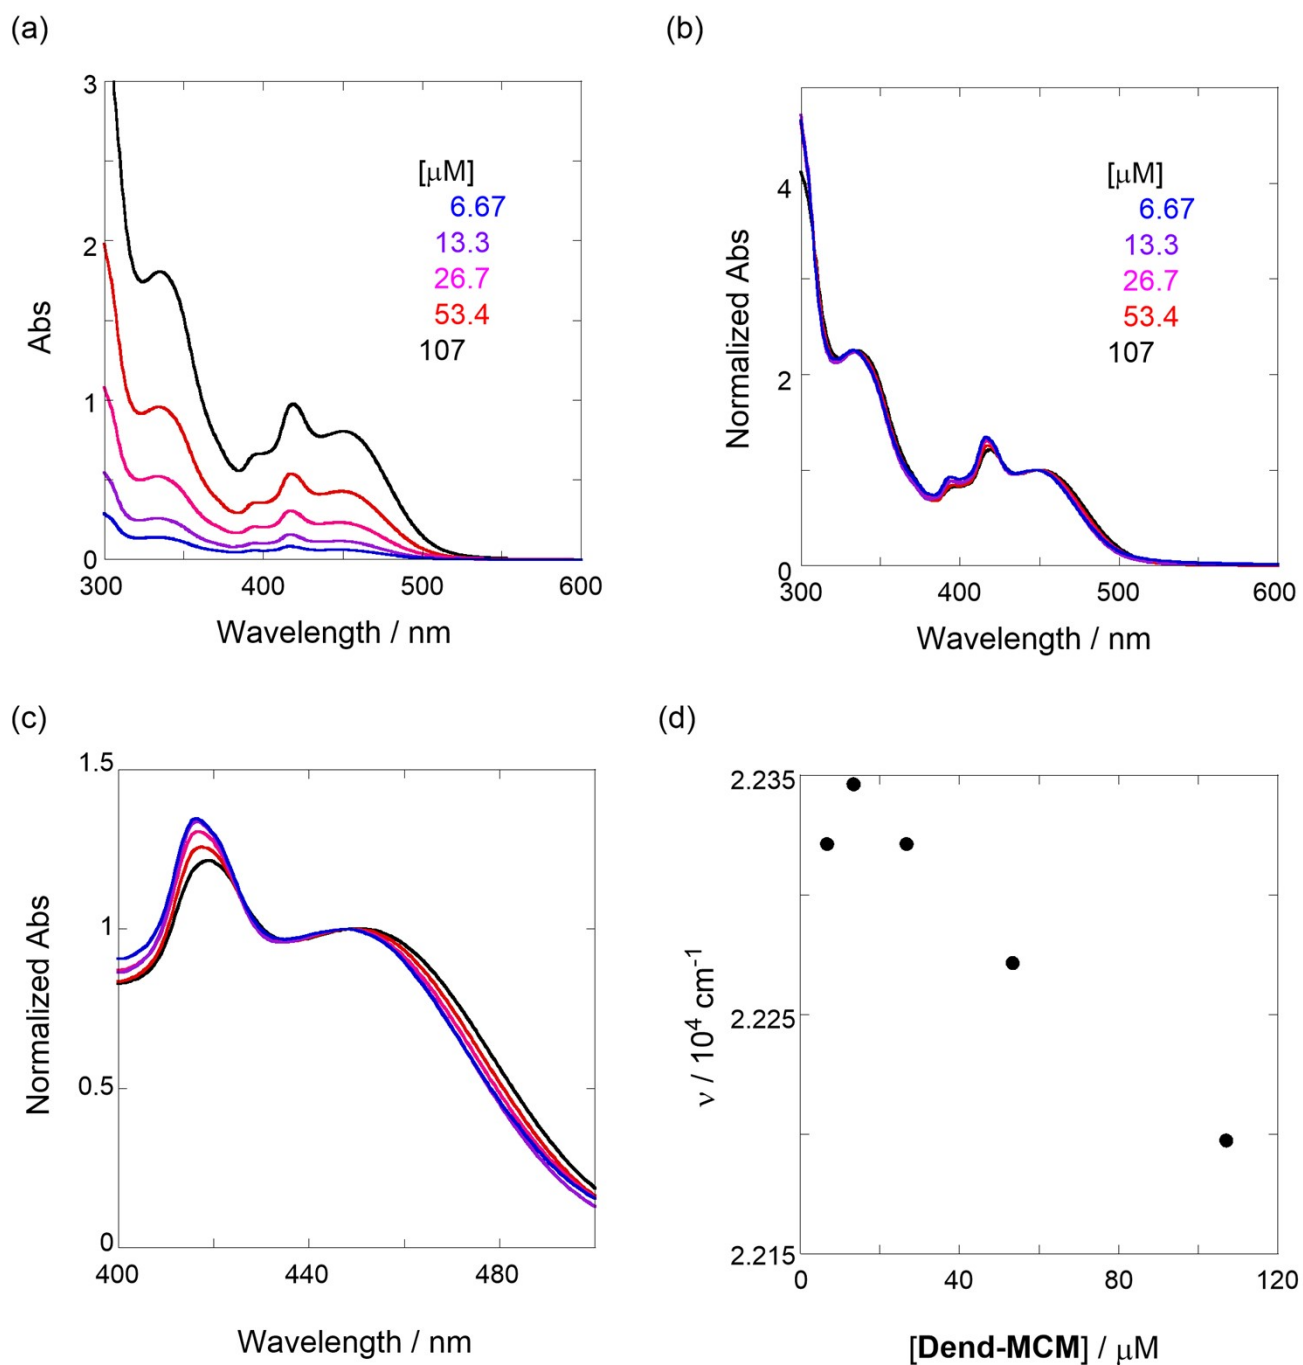

**Figure S8.** (a) Original and (b) normalized UV/vis absorption spectra of **Dend-MCM** in MeOH (6.67, 13.3, 26.7, 53.4, and 107  $\mu\text{M}$ , from blue to black) at room temperature, measured in a 1 cm cell. (c) Magnification of **Figure S8b**. (d) Plots of concentration-dependent wavenumber changes for the absorption maxima of **Dend-MCM** in MeOH.

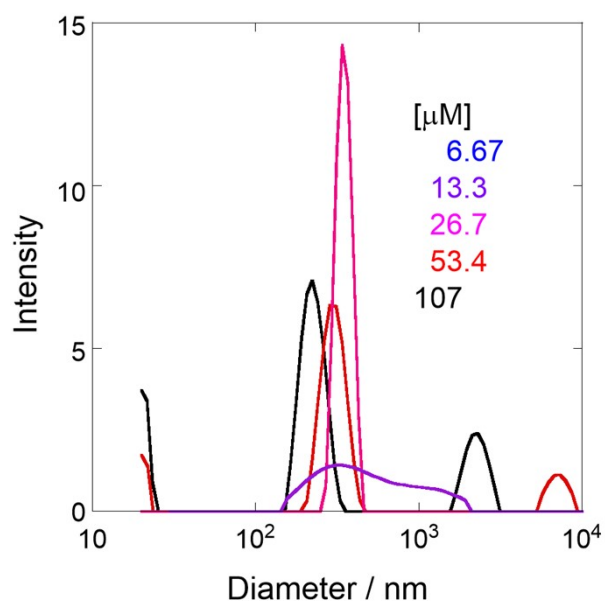

**Figure S9.** DLS profiles of **Dend-MCM** in MeOH (6.67, 13.3, 26.7, 53.4, and 107  $\mu$ M, from blue to black) at room temperature, measured in a 1 cm cell.

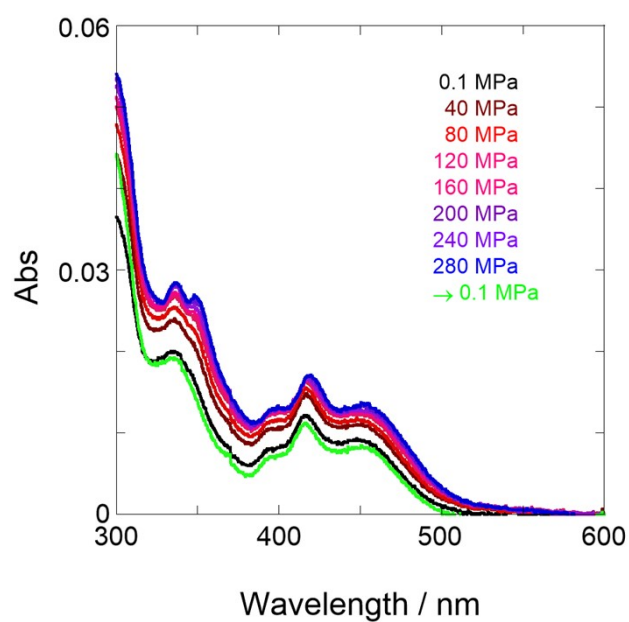

**Figure S10.** UV/vis absorption spectra of **Dend-MCM** in MeOH (4.89  $\mu\text{M}$ ) at room temperature, measured in a high-pressure cell. Applied pressure: 0.1, 40, 80, 120, 160, 200, 240, and 280 MPa (from black to blue). The green line shows the spectrum at 0.1 MPa depressurized from 280 MPa.

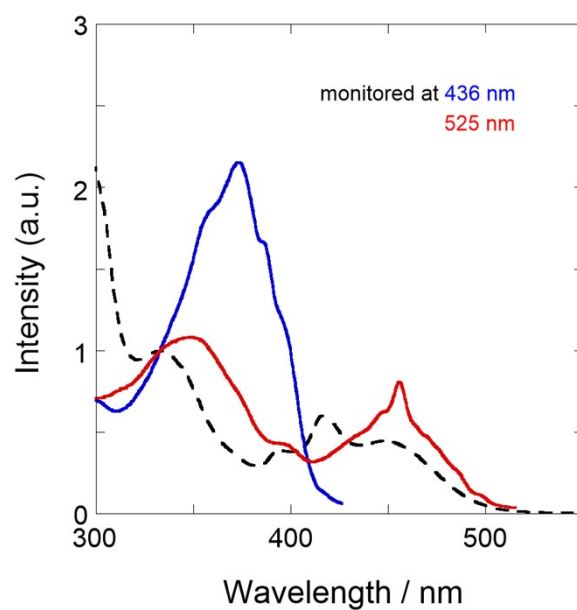

**Figure S11.** Excitation spectra of **Dend-MCM** in MeOH (5.02  $\mu\text{M}$ ), monitored at 436 nm (blue line) and 525 nm (red line) at room temperature, measured in a 1 cm cell.

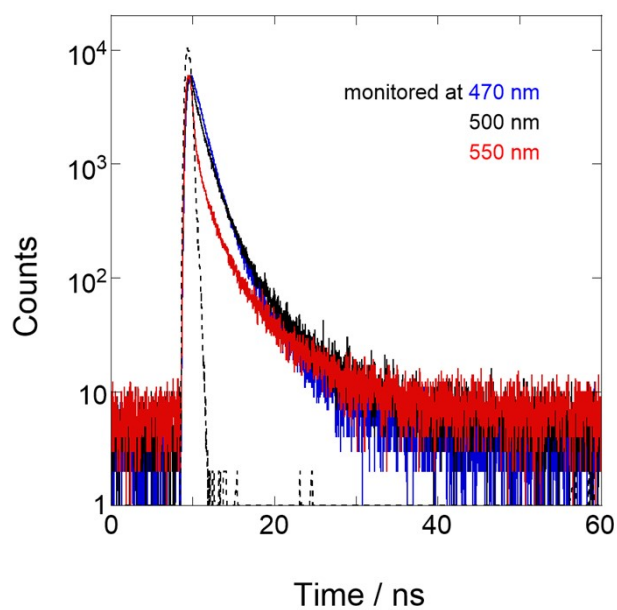

**Figure S12.** Time-correlated fluorescence decays ( $\lambda_{\text{ex}} = 405 \text{ nm}$ ,  $5.02 \mu\text{M}$ ) of **Dend-MCM** in MeOH, monitored at 470 (blue), 500 (black), and 550 nm (red) at room temperature, measured in a 1 cm cell. The black dotted line represents the instrument response function.

**Table S2. Fluorescence lifetimes of Dend-MCM in MeOH ( $\lambda_{\text{ex}} = 405 \text{ nm}$ ,  $5.02 \text{ }\mu\text{M}$ )<sup>a</sup>**

| $\lambda_{\text{em}}/\text{nm}$ | $\tau_1/\text{ns}$ | $A_1$ | $\tau_2/\text{ns}$ | $A_2$ | $\tau_3/\text{ns}$ | $A_3$ | $\chi^2$ |
|---------------------------------|--------------------|-------|--------------------|-------|--------------------|-------|----------|
| 470                             | <0.1               | 0.10  | 1.4                | 0.76  | 4.1                | 0.14  | 1.0      |
| 500                             | 0.1                | 0.21  | 1.4                | 0.57  | 4.1                | 0.22  | 1.1      |
| 550                             | <0.1               | 0.56  | 1.3                | 0.26  | 4.6                | 0.18  | 1.1      |

<sup>a</sup>Fluorescence lifetime ( $\tau_i$ ) and relative abundance ( $A_i$ ) of each excited species, determined using the single-photon counting method in a non-degassed MeOH solution at room temperature.

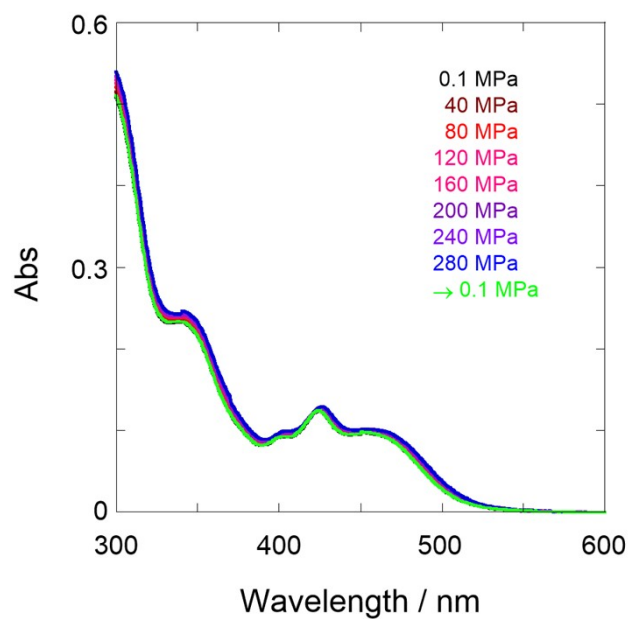

**Figure S13.** UV/vis absorption spectra of **Dend-MCM** in H<sub>2</sub>O (62.3  $\mu$ M) at room temperature, measured in a high-pressure cell. Applied pressure: 0.1, 40, 80, 120, 160, 200, 240, and 280 MPa (from black to blue). The green line shows the spectrum at 0.1 MPa, depressurized from 280 MPa.



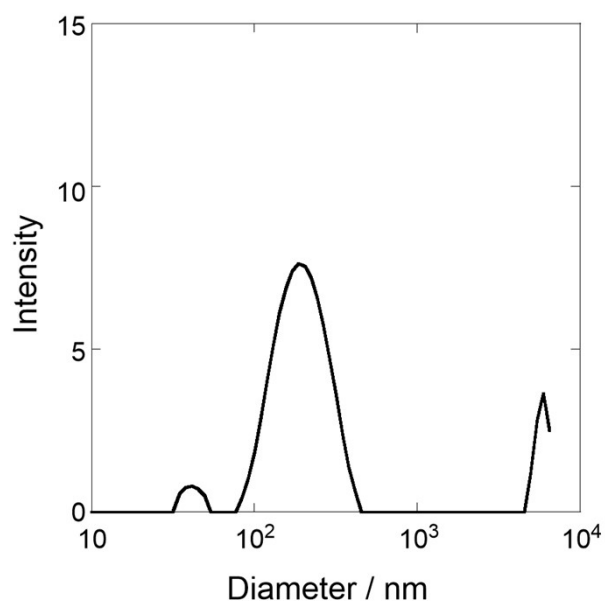

**Figure S14.** DLS of **Dend-MCM** in H<sub>2</sub>O (4.66  $\mu$ M) at room temperature, measured in a 1 cm cell.

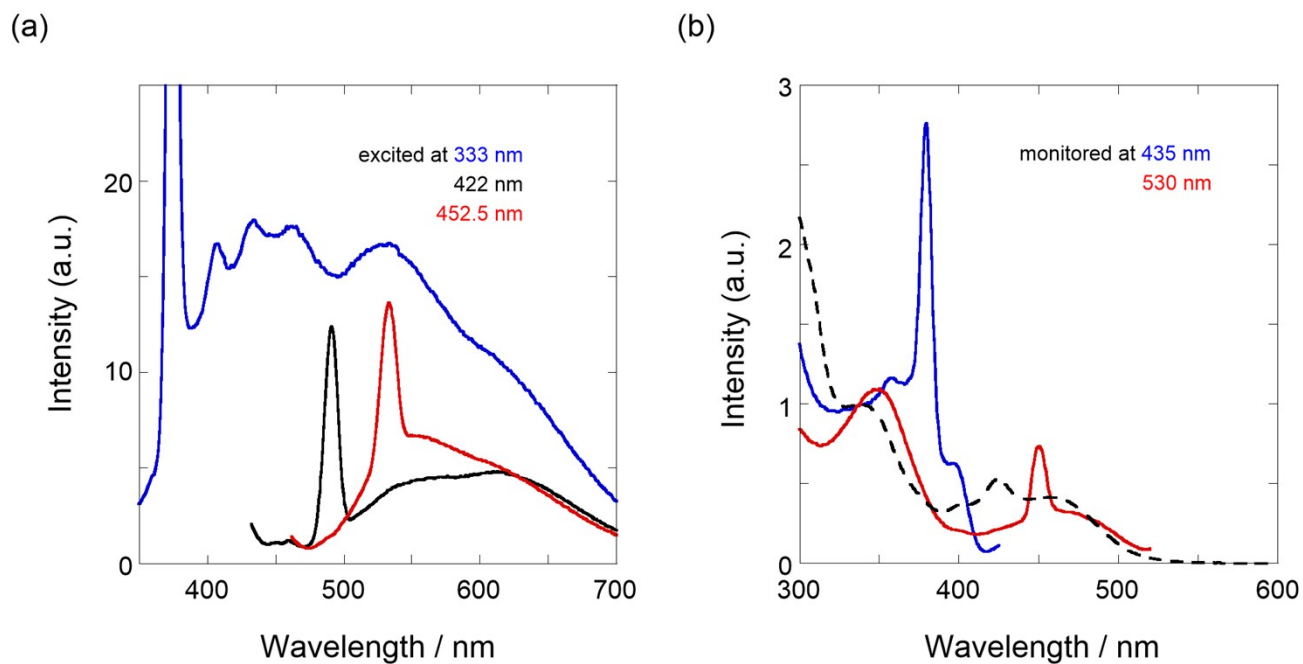

**Figure S15.** (a) Fluorescence spectra of **Dend-MCM** in H<sub>2</sub>O (4.66 μM), excited at 333 nm (blue), 422 nm (black), and 452.5 nm (red) at room temperature, measured in a 1 cm cell. (b) Excitation spectra of **Dend-MCM** in H<sub>2</sub>O (4.66 μM), monitored at 435 nm (blue) and 530 nm (red) at room temperature, measured in a 1 cm cell.

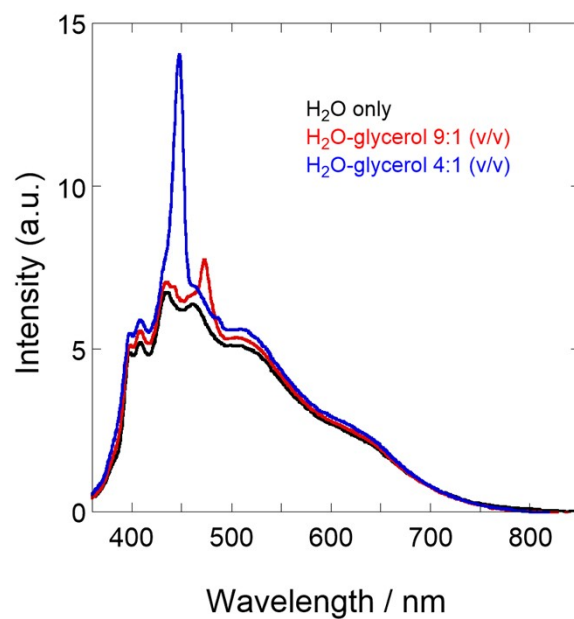

**Figure S16.** Fluorescence spectra ( $\lambda_{\text{ex}}$  350 nm) of **Dend-MCM** in H<sub>2</sub>O (27.7  $\mu\text{M}$ , black line), H<sub>2</sub>O-glycerol 9:1 (v/v) (27.7  $\mu\text{M}$ , red line), and H<sub>2</sub>O-glycerol 4:1 (v/v) (27.7  $\mu\text{M}$ , blue line) at 0.1 MPa, measured in a 1 cm cell.

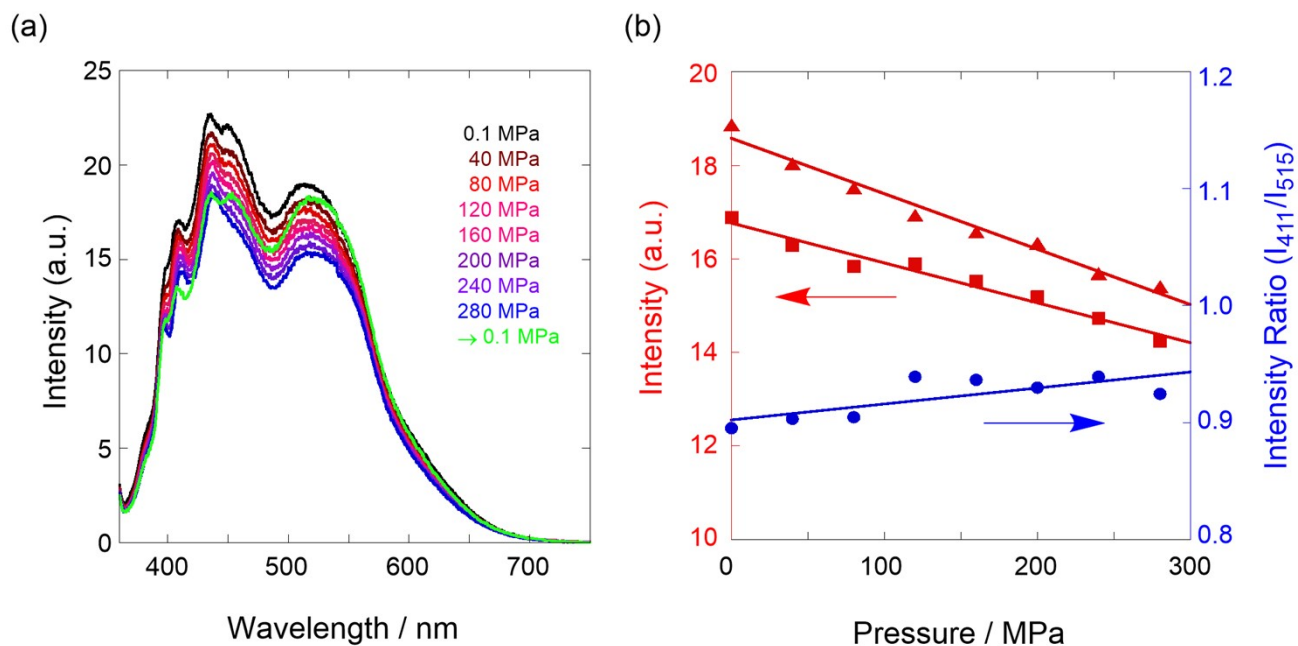

**Figure S17.** Fluorescence spectra ( $\lambda_{\text{ex}}$  350 nm) of **Dend-MCM** in PBS (46.5  $\mu\text{M}$ ) at 0.1, 40, 80, 120, 160, 200, 240, and 280 MPa (from black to blue) at room temperature, measured in a high-pressure cell. The green line shows the spectrum at 0.1 MPa depressurized from 280 MPa. (b) Fluorescence intensity changes of **Dend-MCM** in PBS (46.5  $\mu\text{M}$ ) at 411 nm (red square;  $r = 0.983$ , slope;  $-0.00852 \text{ MPa}^{-1}$ ) and 515 nm (red triangle;  $r = 0.989$ , slope;  $-0.0119 \text{ MPa}^{-1}$ ), and plots illustrating the fluorescence intensity ratio changes between the emissions at 411 nm and 515 nm (blue circle;  $r = 0.747$ , slope;  $0.000137 \text{ MPa}^{-1}$ ).
